# Supplementary material for: Electrocatalytic hydrogen evolution performance of RuO2 nanorods grown on top of WO3 nanotube arrays
Source: Research Square preprint supplement (doi:10.21203/rs.3.rs-6273885/v1), 2025-04-03
Supplement: Supplementary file 1 [file dac7a140af13c45f6fdaae0c.docx]

**Supplemental Data**

**Electrocatalytic hydrogen evolution performance of RuO2 nanorods grown on top of WO3 nanotube arrays**

Man Zhang,a, b Kefeng Wang,a* Jingxiao Ren,c Yong-hua Li,d Heng Jiang,b* Wei Weia*

*a a School of Petrochemical Engineering, Liaoning Petrochemical University, Fushun, Liaoning 113001, China*

*b Henan Engineering Center of New Energy Battery Materials, College of Chemistry and Chemical Engineering, Shangqiu Normal University, Shangqiu 476000, Henan, China*

*c School of Surveying and Planning, Shangqiu Normal University, Shangqiu 476000, China*

*d North Huajin Chemical Industries Group Corporation, Panjin 124000, P. R. China*

**
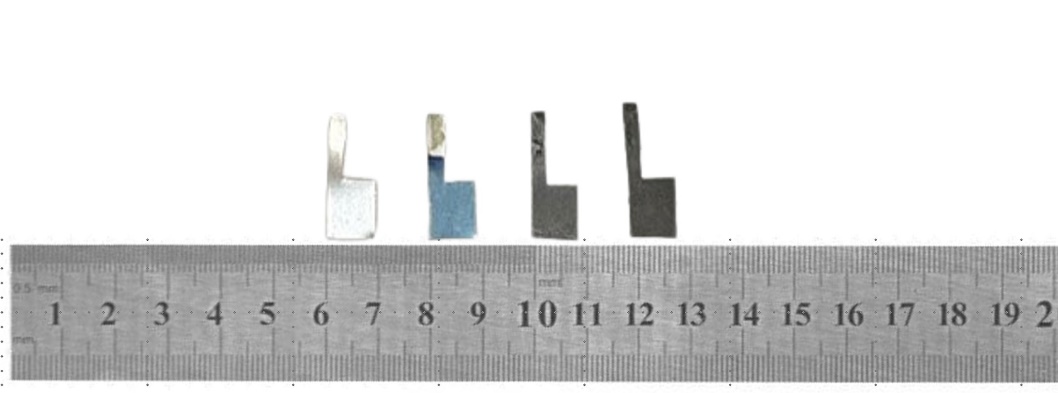
**

**Figure S1** Photographs of blank W foil, anodized W foil (WO3 NTA), Ru(OH)3/WO3 NTA and RuO2 NRs/WO3 NTA.


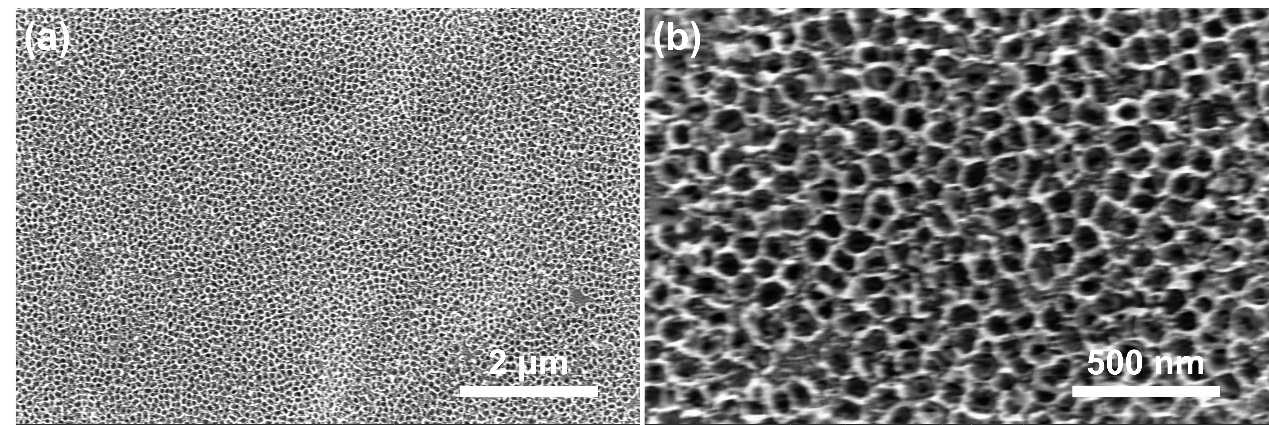


**Figure S2** SEM images of WO3 NTA fabricated through an anodization process using a piece of W foil as the substrate.

**
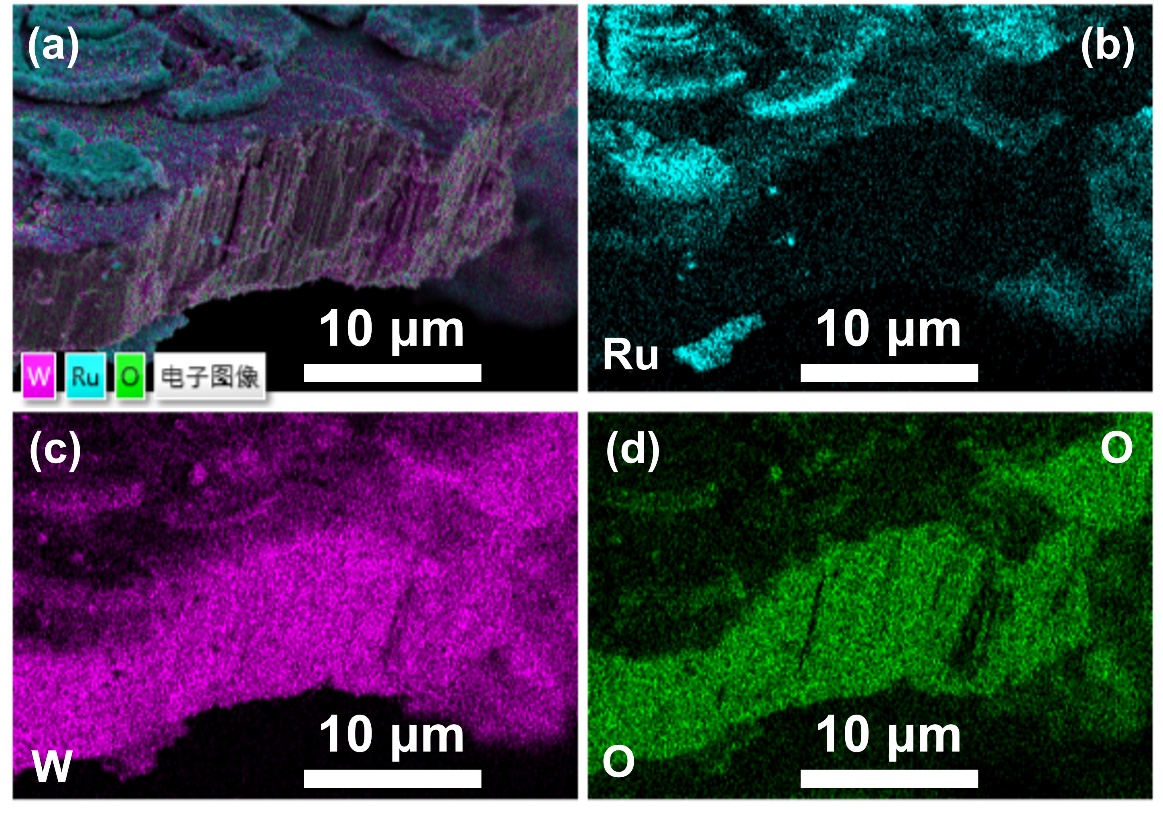
**

**Figure S3** EDS elemental mapping images for RuO2 NRs/WO3 NTA: (a) overlay, (b) Ru, (c) W and (d) O

**
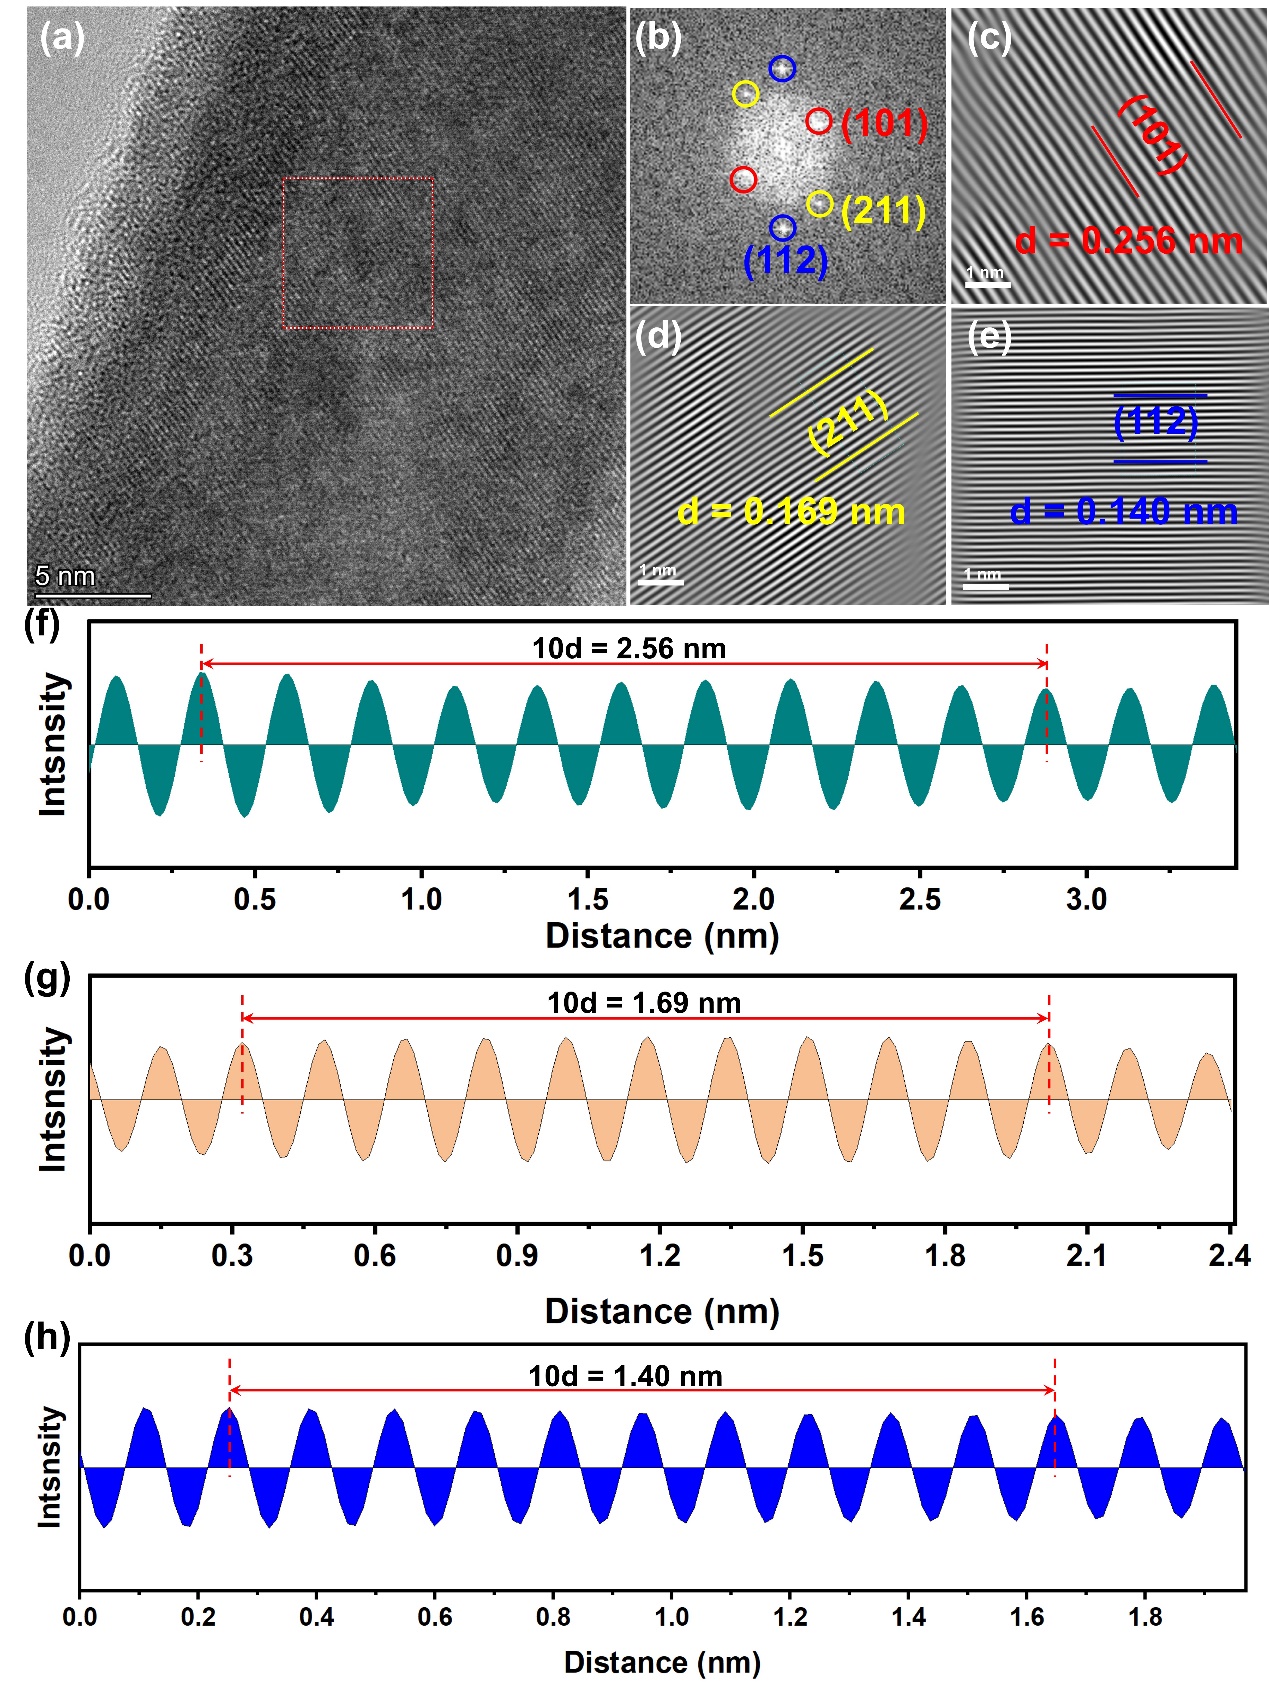
**

**Figure S4** (a) HRTEM image of RuO2 nanorod in RuO2 NRs/WO3 NTA. (b) The fast Fourier transform (FFT) pattern of the selected area in (a). (c~e) Inverse FFT images taken from the square labeled in (b) correspond to the interplanar crystal spacings of (101), (211) and (112) planes of RuO2. (f-h) The corresponding interplanar spacings.

**
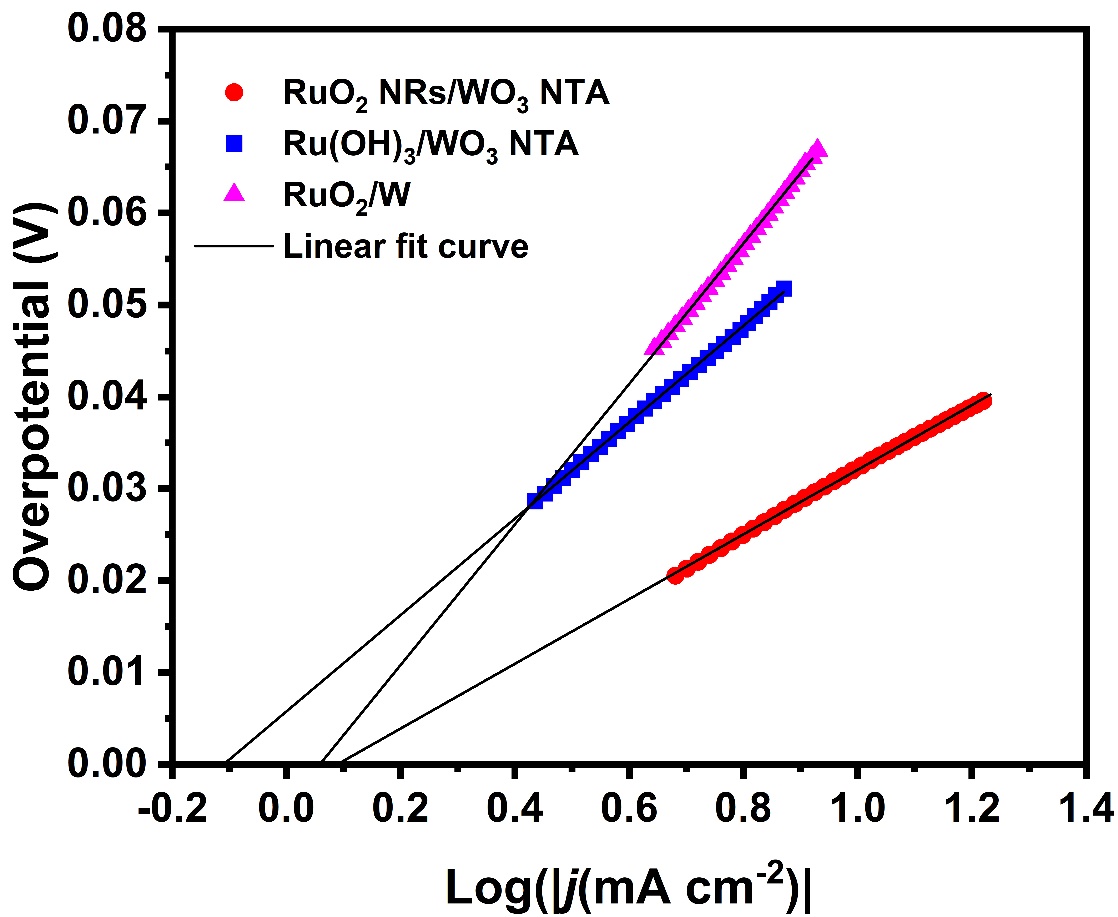
**

**Figure S5** Calculation of the exchange current densities of different catalysts by extrapolating the linear fit of the Tafel plot to its interception.


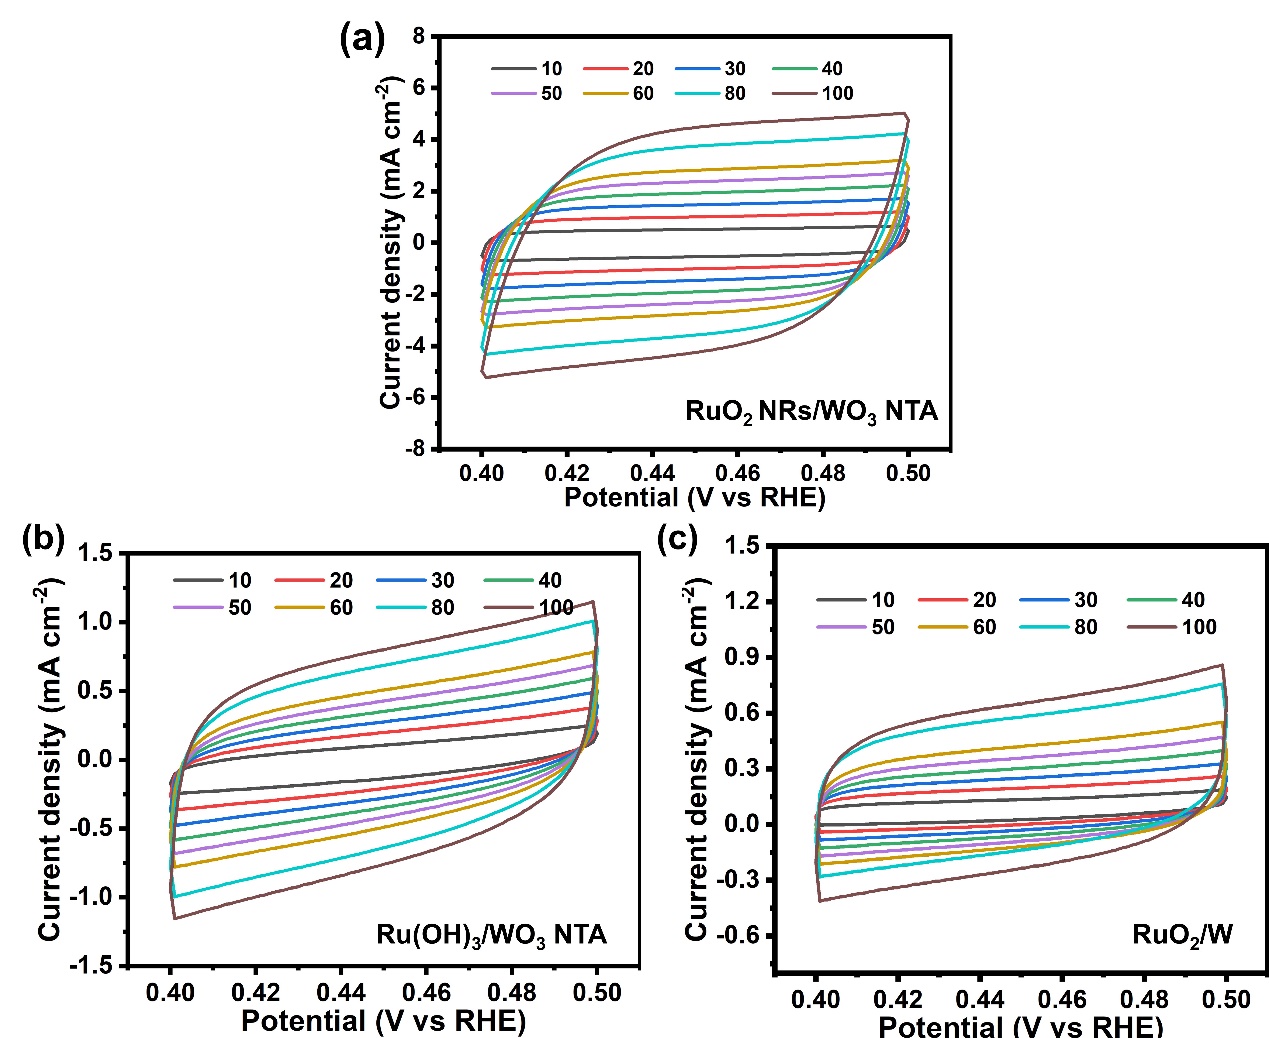


**Figure S6** Cyclic voltammetry (CV) curves with different scan rates of (a) RuO2 NRs/WO3 NRA, (b) Ru(OH)3/WO3 NRA, and (c) RuO2/W in the non-Faradaic regions in 1 M KOH.


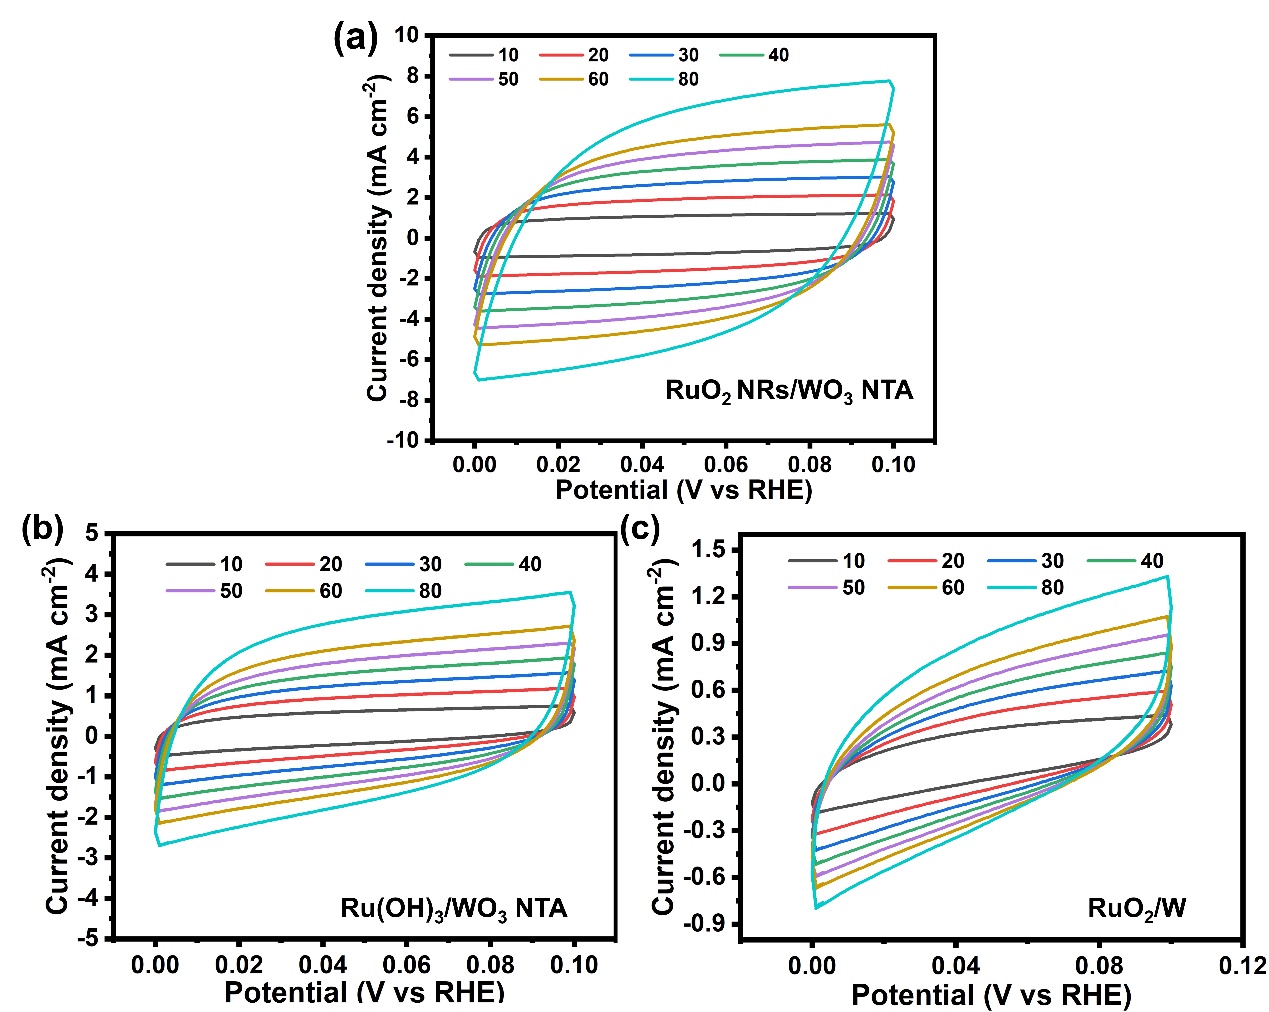


**Figure S7** Cyclic voltammetry (CV) curves with different scan rates of (a) RuO2 NRs/WO3 NRA, (b) Ru(OH)3/WO3 NRA, and (c) RuO2/W in the non-Faradaic regions in 0.5 M H2SO4.

**Table S1** Comparison of alkaline HER performance of RuO2 NRs/WO3 NTA with other reported RuO2-based and Ru-based electrocatalysts

| Catalysts | *η*10 mV | *η*100 mV | Tafel slope (mV dec-1) | Reference |
| --- | --- | --- | --- | --- |
| RuO2 NRs/WO3 NTA | 33 | 83 | 35.2 | This work |
| RuO2@Ni-MWCNTs | 20.21 | 159 | 26.26 | J. Colloid Interface Sci., 2025, 679: 100-108 |
| Ru-RuO2/C-300A | 31 | >100 | 85.4 | Advanced science, 2025, 2414534. |
| Ru/NdOCl | 20 | >100 | 36 | Adv. Mater., 2025, 2417621. |
| RuO2@MoS2 | 114 | >400 | 62.9 | Appl. Surf. Sci., 2021, 538: 148019 |
| RuO2@Fe2O3/HrGO NSs | 239 | >300 | 97 | Int. J. Hydrogen Energy, 2023, 48: 1813-1830 |
| RuO2–Fe2O3 | 148 |  | 43 | Dalton Transactions, 2022, 51: 6314-6331. |
| Mn-RuO2 | 37 | >100 | 40.8 | Chin. Chem. Lett., 2024, 35: 109863. |
| RuO2@TiO2/TP | ~34 | 143 | 94 | Inorg. Chem. Frontiers, 2022, 9: 6602-6607 |
| Ni/Co(OH)2-Ru@NF | 28 | >100 | 23.81 | Small, 2025, 2410086. |
| Ru-RuO2@NPC | ~79 |  | 73 | Appl Catal B: Environ., 2022, 302, 120838. |
| Co-SAC/RuO2 | 45 |  | 58 | Angew Chem Int Ed, 2022, 61, e202114951 |
| Ru@RuO2 | 32 | 84 | 21.7 | Chem Eng J 2023, 460, 141672 |
| nanoporous RuO2 | 87 |  | 45.8 | J. Electroanal. Chem., 2021, 881: 114955 |
| ZIF-8/SnO2@RuO2 | ~198 |  | 55.6 | Mater. Today Commun., 2025, 43: 111769 |
| Ru-mCNFs-300 | 19 | 121 | 39 | Vacuum, 2024, 225: 113258. |
| Ru-RuO2/ MXene@CC | 43 | ~146 | 52.1 | Colloids Surf. Physicochem. Eng. Aspects, 2023, 679: 132638. |
| CoFe2O4/RuO2 | 58 | ~158 | 73.1 | Electrochim. Acta, 2024, 503, 144930 |
| h-RuO2/CNT | ~37 | ~125 | 43.5 | Appl Catal B: Environ., 2024, 365, 124220 |
| NiRuO2−x | 51 |  | 34.4 | J. Colloid Interface Sci., 2023, 630: 940-950. |
| Al doped Rux/RuO2 | 43.97 | 47.1 | 120.04 | J. Mater. Chem. A, 2025, 13: 5091-5105 |
| Ru/CeO2/C | 30 |  | 55.9 | ChemistrySelect, 2024, 9, e202404254 |
| Ir SA/RuO2 | 37 | 88 | 22.6 | Chem. Sci., 2024, 15, 16796–16803 |
| fcc Ru–RuO2/C | 30 | >150 | 21 | J. Mater. Chem. A, 2024, 12, 27540–27548 |

**Table S2** Comparison of acidic HER performance of RuO2 NRs/WO3 NTA with other reported RuO2-based and Ru-based electrocatalysts

| Catalysts | *η*10 mV | Tafel slope (mV dec-1) | Reference |
| --- | --- | --- | --- |
| RuO2 NRs/WO3 NTA | 62 | 35.4 | This work |
| RuO2@Ni-MWCNTs | 73.7 | 48.86 | J. Colloid Interface Sci., 2025, 679: 100-108 |
| Ru-RuO2@NPC | 68 | 56 | Appl Catal B: Environ 2022, 302, 120838. |
| Al doped Rux/RuO2 | >100 | 57.9 | J. Mater. Chem. A, 2025, 13: 5091-5105 |
| Mn(SAs)-Ru/RuO2 | 39 | 14.31 | Adv. Funct. Mater., 2024, 2422166 |
| Ru NPs/Fe5Ni4S8 | 54 | 57 | Small, 2023, e2301721. |
| Mo2C-Ru/C | 64 | 67 | Adv. Funct. Mater., 2023, 2301925 |
| Ru1+NPs/N−C | 75 | 42.7 | ACS Appl. Mater. Interfaces, 2022, 14: 15250-15258. |
| RuFeP-NCs/CNF | 65.8 | 43.4 | Appl. Catal., B, 2021, 283: 119583 |
| Ru@Co/N-CNTs | 92 | 45 | ACS Sustainable Chem. Eng. 2020, 8, 9136−9144 |
| La-doped RuO2 | 71 | 49.3 | Chem. Eng. J., 2022, 439: 135699 |
| RuNi/CQDs | 58 | 55 | Angew. Chem. Int. Ed., 2020, 59: 1718-1726 |
| RuP3–CoP NS | 60 | 56 | Mater. Today Sustainability 2021, 13, 100074 |
| Ru-RuO2-NC | 112 |  | J. Alloys Compd., 2022, 902: 163787. |
| Ru-Ru2P | 48 | 41.2 | InfoMat, 2022, 4: e12287. |
| RuTe2/Graphene | 72 | 33 | Chem. Asian J. 2020, 15, 2886 |
| Ru/ZnRuO2 | 97 | 51.5 | Adv. Funct. Mater. 2024, 34, 2409306 |
| FeCoNiCrTi-RuO2 | ~50 | 69.1 | Small, 2024, 20: 2404019. |
| RuO2/CeO2@C | 120 | 83.1 | Chem. Eng. J., 2024, 479: 147939 |
| RuO2/Co3O4 | 100 | 85.1 | Adv. Energy Sustainability Res., 2023, 4: 2300057 |
| RuO2/C3N4 | 109 | 70.8 | Dalton Trans., 2023, 52, 10515–10521 |
| Pt-RuO2/Ti mesh | 49 | 51.2 | J. Electroanal. Chem., 2023, 932: 117221. |
| Ru@MoO(S)3 | 63 | 32 | Nano Energy, 2022, 100: 107445 |
| RuO2-WC NPs | 58 | 66 | Angew. Chem. 2022, 134, e202202519 |
| Ru/WO3-W2N/NC | 110 | 70 | J. Colloid Interface Sci., 2023, 636, 618–626 |
